# Supplementary material for: Pharmacogenomic study on anti-VEGF medicine in treatment of macular Neovascular diseases: a study protocol for a prospective observational study
Source: Springer Nature journal article supplement (doi:10.1186/s12886-018-0812-4), 2018-07-24
Supplement: MOESM1 [file 15975058]

**A prospective, observational,  
multicenter and register study on  
conbercept treating macular  
neovascular diseases**

**Case report form**

**Version 1.0**

**2016. 11. 05**

---

**A prospective, observational, multicenter  
and register study on conbercept treating  
macular neovascular diseases**

**Medical record  
version 1.0**

Patient's name: \_\_\_\_\_

Patient's number: \_\_\_\_\_

Research center: \_\_\_\_\_

Organizer: Shanghai General Hospital

---

## Index

- 1、 This medical record should be written by investigators or authorized person.
- 2、 Medical record and patients' number should be filled in after informed consent is obtained, and patients' name should be consistent with ID card.
- 3、 This record should be written timely, accurately, completely, and can not be leaved out and amended freely. The data can not be faked.

### Notifications for filling the records:\_\_\_

- 1) This record should be written in black or black blue pen;
- 2) This record should be kept intact, and pages can not be missing or replaced;
- 3) Please write“×” in “□”;
- 4) If there are mistakes needs to be corrected, it can't be blacked; the mistakes should be crossed with a single line, and the corrections, signatures, and date should be written besides.
- 5) Investigators should sign in full name clearly, and the data should be recorded in 8 digits, such as: 2010/07/20.

---

## **Informed consent**

Signed informed?   ☐Yes                ☐No

Date: 201\_\_ / \_\_ \_\_ / \_\_ \_\_

Whether the patient got the copy of informed consent?

☐Yes                ☐No

Investigator(signature): \_\_\_\_\_

---

**V1: Baseline**

Visit date: 201\_\_ / \_\_ \_\_ / \_\_ \_\_

**Basic information**

Name: \_\_\_\_\_ Gender: ☐Male ☐Female

Birth date: \_\_\_\_\_ year \_\_\_\_\_ month \_\_\_\_\_ date

Ethnic: \_\_\_\_\_ Educational level: \_\_\_\_\_

Profession: \_\_\_\_\_ Telephone: \_\_\_\_\_

Home address: \_\_\_\_\_

ID number: ☐☐☐☐☐☐☐☐☐☐☐☐☐☐☐☐☐☐☐☐☐☐

**Inclusion and exclusion criteria**

| Inclusion criteria                                                                                                                                                                                                                                          | Yes                      | No                       |
|-------------------------------------------------------------------------------------------------------------------------------------------------------------------------------------------------------------------------------------------------------------|--------------------------|--------------------------|
| Signed informed                                                                                                                                                                                                                                             | <input type="checkbox"/> | <input type="checkbox"/> |
| Patients were diagnosed with macular neovascular diseases (age-related macular degeneration (AMD), polypoidal choroidal vasculopathy (PCV), choroidal neovascularization secondary to pathological myopia (PM)); no gender requirement; age $\geq 18$ year. | <input type="checkbox"/> | <input type="checkbox"/> |

---

|                                                                            |                          |                          |
|----------------------------------------------------------------------------|--------------------------|--------------------------|
| Patients will receive intravitreal injection of conbercept                 | <input type="checkbox"/> | <input type="checkbox"/> |
| Patients are willing to have a long-term follow-up in the clinical center. | <input type="checkbox"/> | <input type="checkbox"/> |

| Exclusion criteria                                                                                                                 | Yes                      | No                       |
|------------------------------------------------------------------------------------------------------------------------------------|--------------------------|--------------------------|
| Participate in other intervention therapy at the same time                                                                         | <input type="checkbox"/> | <input type="checkbox"/> |
| Received anti-VEGF treatment (including intravitreal injection or systematic application) within three months prior to enrollment. | <input type="checkbox"/> | <input type="checkbox"/> |

### **General conditions**

Vital signs: T\_\_\_\_°C; P\_\_\_\_ beats/min;

R\_\_\_\_ times/min; BP\_\_\_/\_\_\_mmHg.

### **History of systematic diseases**

(Cardiovascular events: myocardial infarction, stroke, thromboembolic events; obesity,

---

coronary artery disease Disease, family history,  
high cholesterol, hyperlipidemia, hypertension,  
diabetes and other medical history )

---

---

---

---

---

---

---

Concomitant medication /important Non-drug treatments\_

---

---

---

Targeted eye: ☐OD ☐OS

Blood sample collection: ☐Yes ☐No

**Eye examination:**

ETDRS vision: OD\_\_\_\_\_ OS\_\_\_\_\_

Intraocular pressure (mmHg) : \_\_\_\_\_

---

OD\_\_\_\_\_ OS\_\_\_\_\_

Cornea: \_\_\_\_\_

Anterior chamber: \_\_\_\_\_

Iris: \_\_\_\_\_

Lens: \_\_\_\_\_

Vitreous: \_\_\_\_\_

Fundus: \_\_\_\_\_

### **Imaging examinations:**

Optical coherence tomography(OCT):

OCT central foveal retinal thickness : \_\_\_\_\_ $\mu\text{m}$

OCT volume of central fovea: \_\_\_\_\_ $\text{mm}^3$

Fluorescein fundus angiography (FFA) :

CNV area: \_\_\_\_\_ $\text{mm}^2$ ;

Macular leakage area: \_\_\_\_\_ $\text{mm}^2$ ;

Focus area: \_\_\_\_\_ $\text{mm}^2$

Injection date: 201\_\_ / \_\_ \_\_ / \_\_ \_\_

Investigator(signature): \_\_\_\_\_

Date: \_\_\_\_\_



---

**V2: 1 month after first injection**

Visit date: 201\_\_ / \_\_ \_\_ / \_\_ \_\_

Last injection date: 201\_\_ / \_\_ \_\_ / \_\_ \_\_

Targeted eye: ☐OD ☐OS

Vital signs: T\_\_\_\_°C; P\_\_\_\_ beats/min;

R\_\_\_\_ times/min; BP\_\_/\_\_mmHg.

Concomitant medication /important Non-drug treatment\_\_

---

---

---

Blood sample collection: ☐Yes ☐No

**Adverse events** (last visit till now)

Adverse events ☐None ☐Yes→If any,  
please record in detail (including adverse event name,  
part of the body, start time, end time, severity, measures  
taken, the outcome of adverse events, correlation with  
the study treatment, etc.)

---

---

---

---

**Eye examination:**

ETDRS vision: OD\_\_\_\_\_ OS\_\_\_\_\_

Intraocular pressure (mmHg) : \_\_\_\_\_

OD\_\_\_\_\_ OS\_\_\_\_\_

Cornea: \_\_\_\_\_

Anterior chamber: \_\_\_\_\_

Iris: \_\_\_\_\_

Lens: \_\_\_\_\_

Vitreous: \_\_\_\_\_

Fundus: \_\_\_\_\_

**Imaging examinations:**

Optical coherence tomography(OCT):

OCT central foveal retinal thickness : \_\_\_\_\_ $\mu\text{m}$

OCT volume of central fovea: \_\_\_\_\_ $\text{mm}^3$

Fluorescein fundus angiography (FFA) :

CNV area: \_\_\_\_\_ $\text{mm}^2$ ;

---

Macular leakage area: \_\_\_\_\_. \_\_\_\_ mm<sup>2</sup>;

Focus area: \_\_\_\_\_. \_\_\_\_ mm<sup>2</sup>

Injection date: 201\_\_ / \_\_ \_\_ / \_\_ \_\_

Investigator(signature): \_\_\_\_\_

Date: \_\_\_\_\_

**V3: 3 months after first injection**

Visit date: 201\_\_ / \_\_ \_\_ / \_\_ \_\_

Targeted eye: ☐OD ☐OS

Vital signs: T\_\_\_\_°C; P\_\_\_\_ beats/min;

R\_\_\_\_ times/min; BP\_\_/\_\_mmHg.

Concomitant medication /important Non-drug treatment\_\_

---

---

---

**Adverse events** ☐None ☐Yes→If any,

please record in detail (including adverse event name,  
part of the body, start time, end time, severity, measures

---

taken, the outcome of adverse events, correlation with the study treatment, etc.)

---

---

---

### **Eye conditions**

Records of conbercept treatment (including date of treatment and number of injections; treatment status: under treatment, treatment suspended ,quit, the reasons ; regimen record : left / right eye, specific treatment registration)

---

---

### **Eye examination:**

ETDRS vision: OD\_\_\_\_\_ OS\_\_\_\_\_

Intraocular pressure (mmHg) : \_\_\_\_\_

OD\_\_\_\_\_ OS\_\_\_\_\_

Cornea: \_\_\_\_\_

Anterior chamber: \_\_\_\_\_

Iris: \_\_\_\_\_

---

Lens: \_\_\_\_\_

Vitreous: \_\_\_\_\_

Fundus: \_\_\_\_\_

**Imaging examinations:**

Optical coherence tomography(OCT):

OCT central foveal retinal thickness : \_\_\_\_\_ $\mu\text{m}$

OCT volume of central fovea: \_\_\_\_\_ $\text{mm}^3$

Fluorescein fundus angiography (FFA) :

CNV area: \_\_\_\_\_  $\text{mm}^2$ ;

Macular leakage area: \_\_\_\_\_  $\text{mm}^2$ ;

Focus area: \_\_\_\_\_  $\text{mm}^2$

Injection date: 201\_\_ / \_\_ \_\_ / \_\_ \_\_

Investigator(signature): \_\_\_\_\_

Date: \_\_\_\_\_

**V4: 6 months after first injection**

Visit date: 201\_\_ / \_\_ \_\_ / \_\_ \_\_

Targeted eye: ☐OD ☐OS

---

Vital signs: T\_\_\_\_ °C; P\_\_\_\_ beats/min;

R\_\_\_\_ times/min; BP \_\_/\_\_ mmHg.

Concomitant medication /important Non-drug treatment\_\_

---

---

---

**Adverse events**      ☐None      ☐Yes→If any,  
please record in detail (including adverse event name,  
part of the body, start time, end time, severity, measures  
taken, the outcome of adverse events, correlation with  
the study treatment, etc.)

---

---

---

## **Eye conditions**

Records of conbercept treatment (including date of  
treatment and number of injections; treatment status:  
under treatment, treatment suspended ,quit, the reasons ;  
regimen record : left / right eye, specific treatment  
registration)

---

---

---

**Eye examination:**

ETDRS vision: OD\_\_\_\_\_ OS\_\_\_\_\_

Intraocular pressure (mmHg) : \_\_\_\_\_

OD\_\_\_\_\_ OS\_\_\_\_\_

Cornea: \_\_\_\_\_

Anterior chamber: \_\_\_\_\_

Iris: \_\_\_\_\_

Lens: \_\_\_\_\_

Vitreous: \_\_\_\_\_

Fundus: \_\_\_\_\_

**Imaging examinations:**

Optical coherence tomography(OCT):

OCT central foveal retinal thickness : \_\_\_\_\_ $\mu\text{m}$

OCT volume of central fovea: \_\_\_\_\_ $\text{mm}^3$

Fluorescein fundus angiography (FFA) :

CNV area: \_\_\_\_\_  $\text{mm}^2$ ;

Macular leakage area: \_\_\_\_\_  $\text{mm}^2$ ;

Focus area: \_\_\_\_\_  $\text{mm}^2$

Injection date: 201\_\_ / \_\_ \_\_ / \_\_ \_\_

---

Investigator(signature): \_\_\_\_\_

Date: \_\_\_\_\_

**V5: 12 months after first injection**

Visit date: 201\_\_ / \_\_ \_\_ / \_\_ \_\_

Targeted eye: ☐OD ☐OS

Vital signs: T\_\_\_\_°C; P\_\_\_\_ beats/min;

R\_\_\_\_ times/min; BP\_\_/\_\_mmHg.

Concomitant medication /important Non-drug treatment\_\_

---

---

---

Blood sample collection: ☐Yes ☐No

**Adverse events** (last visit till now)

Adverse events ☐None ☐Yes→If any,  
please record in detail (including adverse event name,



---

part of the body, start time, end time, severity, measures taken, the outcome of adverse events, correlation with the study treatment, etc.)

---

---

---

---

### **Eye conditions**

Record of conbercept treatment (including date of treatment and number of injections; treatment status: under treatment, treatment suspended, quit, the reasons; regimen record: left / right eye, specific treatment registration)

---

---

### **Eye examination:**

ETDRS vision: OD\_\_\_\_\_ OS\_\_\_\_\_

Intraocular pressure (mmHg) : \_\_\_\_\_

OD\_\_\_\_\_ OS\_\_\_\_\_

---

Cornea: \_\_\_\_\_

Anterior chamber: \_\_\_\_\_

Iris: \_\_\_\_\_

Lens: \_\_\_\_\_

Vitreous: \_\_\_\_\_

Fundus: \_\_\_\_\_

### **Imaging examinations:**

Optical coherence tomography(OCT):

OCT central foveal retinal thickness : \_\_\_\_\_ $\mu\text{m}$

OCT volume of central fovea: \_\_\_\_\_ $\text{mm}^3$

Fluorescein fundus angiography (FFA) :

CNV area: \_\_\_\_\_ $\text{mm}^2$ ;

Macular leakage area: \_\_\_\_\_ $\text{mm}^2$ ;

Focus area: \_\_\_\_\_ $\text{mm}^2$

Injection date: 201\_\_ / \_\_ \_\_ / \_\_ \_\_

Investigator(signature): \_\_\_\_\_

Date: \_\_\_\_\_
