# Supplementary material for: Pharmacogenomic study on anti-VEGF medicine in treatment of macular Neovascular diseases: a study protocol for a prospective observational study
Source: Springer Nature journal article supplement (doi:10.1186/s12886-018-0812-4), 2018-07-24
Supplement: MOESM2 [file 15975058]

Supplemental table. Clinical information collected from V1 to V5

|                             |                                                                                                                                                                                                             |
|-----------------------------|-------------------------------------------------------------------------------------------------------------------------------------------------------------------------------------------------------------|
| V1 (baseline)               |                                                                                                                                                                                                             |
| Demographics                | Name, sex, date of birth, race, ethnicity,<br>education level, occupation, contact details                                                                                                                  |
| Vital signs                 | Height, weight, body temperature, respiration,<br>pulse and blood pressure                                                                                                                                  |
| History of systemic disease | Cardiovascular events: myocardial infarction,<br>stroke, thromboembolic events; obesity,<br>coronary artery disease Disease, family history,<br>high-cholesterol, hyperlipidemia, hypertension,<br>diabetes |

|                                                          |                                                                                                                                                                         |
|----------------------------------------------------------|-------------------------------------------------------------------------------------------------------------------------------------------------------------------------|
|                                                          | and other medical history                                                                                                                                               |
| Concomitant medication /<br>important non-drug treatment | Any ongoing drug / therapy                                                                                                                                              |
| Blood sample collection                                  | Patients need to collect baseline peripheral blood<br>(procoagulant tube and EDTA anticoagulant<br>tubes) for further genomics and metabolomics<br>detection.           |
| Eye conditions                                           |                                                                                                                                                                         |
| Eye disease history                                      | Refractive errors; eye injury;<br>Medical history (including duration;<br>Intraocular injection history and drug name;<br>Previous adverse reactions and severe adverse |

|                                                          |                                                                                                                                                                                                                                                                                                                |
|----------------------------------------------------------|----------------------------------------------------------------------------------------------------------------------------------------------------------------------------------------------------------------------------------------------------------------------------------------------------------------|
|                                                          | reactions, etc.)                                                                                                                                                                                                                                                                                               |
| Eye examination                                          | 1. Best corrected visual acuity (BCVA) using ETDRS visual acuity table;<br>2. Sit lamp examination<br>3. Optical coherence tomography, OCT)<br>4. Intraocular pressure detection<br>5. Color fundus photography<br>6. Fluorescein fundus angiography (FFA)<br>7. Indocyanine green angiography (ICGA) (if any) |
| V2 (1 month after treatment)                             |                                                                                                                                                                                                                                                                                                                |
| Concomitant medication /<br>important non-drug treatment | Any ongoing drug / therapy                                                                                                                                                                                                                                                                                     |
| Blood sample collection                                  | After the first month of treatment patients' peripheral blood sample need to be collected (one procoagulant tube and one EDTA anticoagulant tube) for further genomics and metabolomics                                                                                                                        |

|                              |                                                                                                                                                                                                                                                                                                |
|------------------------------|------------------------------------------------------------------------------------------------------------------------------------------------------------------------------------------------------------------------------------------------------------------------------------------------|
|                              | detection.                                                                                                                                                                                                                                                                                     |
| Eye conditions               |                                                                                                                                                                                                                                                                                                |
| Conbercept therapy recording | <ol style="list-style-type: none"> <li>1. Date of treatment and number of injections;</li> <li>2. Treatment status: under treatment, treatment suspended, quit, and the reasons)</li> <li>3. Regimen record (Left / right eye, specific treatment registration)</li> </ol>                     |
| Eye examination              | <ol style="list-style-type: none"> <li>1. Best corrected visual acuity (BCVA) using ETDRS visual acuity table</li> <li>2. Slit lamp fundus examination and optical coherence tomography (OCT)</li> <li>3. Intraocular pressure detection (IOP)</li> <li>4. Color fundus photography</li> </ol> |

|                                                          |                                                                                                                                                                                                                                                                                                                                                                                                       |
|----------------------------------------------------------|-------------------------------------------------------------------------------------------------------------------------------------------------------------------------------------------------------------------------------------------------------------------------------------------------------------------------------------------------------------------------------------------------------|
| V3 (3 months)/<br>V4 (6 months)                          |                                                                                                                                                                                                                                                                                                                                                                                                       |
| Concomitant medication /<br>important non-drug treatment | Any ongoing drug / therapy                                                                                                                                                                                                                                                                                                                                                                            |
| Safety                                                   | Doctors need to carefully ask the patients' adverse events / severe adverse events since participated in the registration study (including adverse event name, location, start time end time, the severity classification, the measures taken, the outcome of adverse events, the relationship with the study treatment, whether the adverse events affects eyes, etc.), and fill the follow-up table |
| Eye conditions                                           |                                                                                                                                                                                                                                                                                                                                                                                                       |
| Compressor treatment Case record                         | 1. Date of treatment and number of injection;<br>2. Treatment status: under treatment, treatment                                                                                                                                                                                                                                                                                                      |

|                                                       |                                                                                                                                                                                                                                                                                                                                               |
|-------------------------------------------------------|-----------------------------------------------------------------------------------------------------------------------------------------------------------------------------------------------------------------------------------------------------------------------------------------------------------------------------------------------|
|                                                       | <p>suspended, quit, and the reasons)</p> <p>3. Regimen record (Left / right eye, specific treatment registration)</p>                                                                                                                                                                                                                         |
| Eye examination                                       | <p>1. Best corrected visual acuity (BCVA) using ETDRS visual acuity table;</p> <p>2. Sit lamp examination</p> <p>3. Optical coherence tomography, OCT)</p> <p>4. Intraocular pressure detection</p> <p>5. Color fundus photography</p> <p>6. Fluorescein fundus angiography (FFA)</p> <p>7. Indocyanine green angiography (ICGA) (if any)</p> |
| V5 (12 months)                                        |                                                                                                                                                                                                                                                                                                                                               |
| Concomitant medication / important Non-drug treatment | Any ongoing drug / therapy                                                                                                                                                                                                                                                                                                                    |
| Blood sample collection                               | After 12 months of treatment, patients' peripheral                                                                                                                                                                                                                                                                                            |

|                      |                                                                                                                                                                                                                                                                                                            |
|----------------------|------------------------------------------------------------------------------------------------------------------------------------------------------------------------------------------------------------------------------------------------------------------------------------------------------------|
|                      | blood sample need to be collected (one procoagulant tube and one EDTA anticoagulant tube) for further genomics and metabolomics detection                                                                                                                                                                  |
| Safety               | Doctors need to carefully ask patients' adverse events since participation /severe adverse events (including adverse event name, part of the body, start time, end time, severity, measures taken, the outcome of adverse events, correlation with the study treatment, etc.), and fill up follow-up table |
| Eye conditions       |                                                                                                                                                                                                                                                                                                            |
| Conbercept treatment | <p>Date of treatment</p> <p>Number of intravitreal injection</p>                                                                                                                                                                                                                                           |
| Case record          | <p>1. Date of treatment and number of injection;</p> <p>2. Treatment status: under treatment, treatment</p>                                                                                                                                                                                                |

|                 |                                                                                                                                                                                                                                                          |
|-----------------|----------------------------------------------------------------------------------------------------------------------------------------------------------------------------------------------------------------------------------------------------------|
|                 | <p>suspended, quit, and the reasons)</p> <p>3. Regimen record (Left / right eye, specific treatment registration)</p>                                                                                                                                    |
| Eye examination | <p>1. Best corrected visual acuity (BCVA) using ETDRS visual acuity table;</p> <p>2. Slit lamp fundus examination;</p> <p>3. Optical coherence tomography (OCT);</p> <p>4. Intraocular pressure detection (IOP);</p> <p>5. Color fundus photography.</p> |
| Note            | <p>1. If patients do not agree to blood sampling or researchers in practice did not collect blood samples, does not affect the patient's enrollment in this registration study.</p> <p>2. If the patient fails to come to the clinic, then the</p>       |



|  |                                                 |
|--|-------------------------------------------------|
|  | researchers should make a phone call follow up. |
|--|-------------------------------------------------|
